# Supplementary material for: Fabrication of one-dimensional Bi2O3–Bi14MoO24heterojunction photocatalysts with high interface quality
Source: Royal Society of Chemistry journal article supplement (doi:10.1039/c6ce01948j), 2016-11-15
Supplement: c6ce01948j1.pdf [file c6ce01948j1.pdf]

## SUPPORTING INFORMATION

### **Fabrication of one-dimensional Bi<sub>2</sub>O<sub>3</sub>-Bi<sub>14</sub>MoO<sub>24</sub> heterojunction photocatalyst with high interface quality**

**Yin Peng<sup>\*a,b</sup>, Ke Ke Wang<sup>a</sup>, Jian Xu<sup>a</sup>, Qing Guo Chen<sup>a</sup>, Bin Gang Xu<sup>\*b</sup>, An Wu Xu<sup>\*c</sup>**

<sup>a</sup> The Key Laboratory of Functional Molecular Solids, Ministry of Education, College of Chemistry and Materials Science, Anhui Normal University, Wuhu 241000, China

<sup>b</sup> Nanotechnology Center, Institute of Textiles and Clothing, The Hong Kong Polytechnic University, Hung Hom, Kowloon, Hong Kong

E-mail: txubg@polyu.edu.hk

<sup>c</sup> Division of Nanomaterials and Chemistry, Hefei National Laboratory for Physical Sciences at Microscale, Department of Chemistry, University of Science and Technology of China, Hefei 230026, P. R. China.

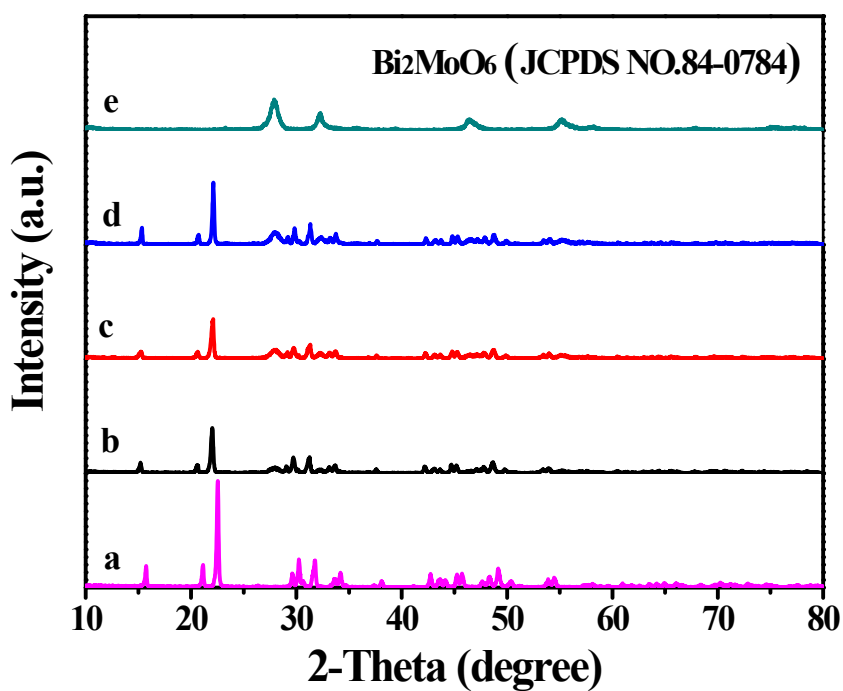

**Figure S1.** The XRD patterns of the precursors, (a)  $\text{Bi}(\text{OHC}_2\text{O}_4)\cdot 2\text{H}_2\text{O}$ , (b) S-1, (c) S-2, (d) S-3 and (e)  $\text{Bi}_2\text{MoO}_6$ .

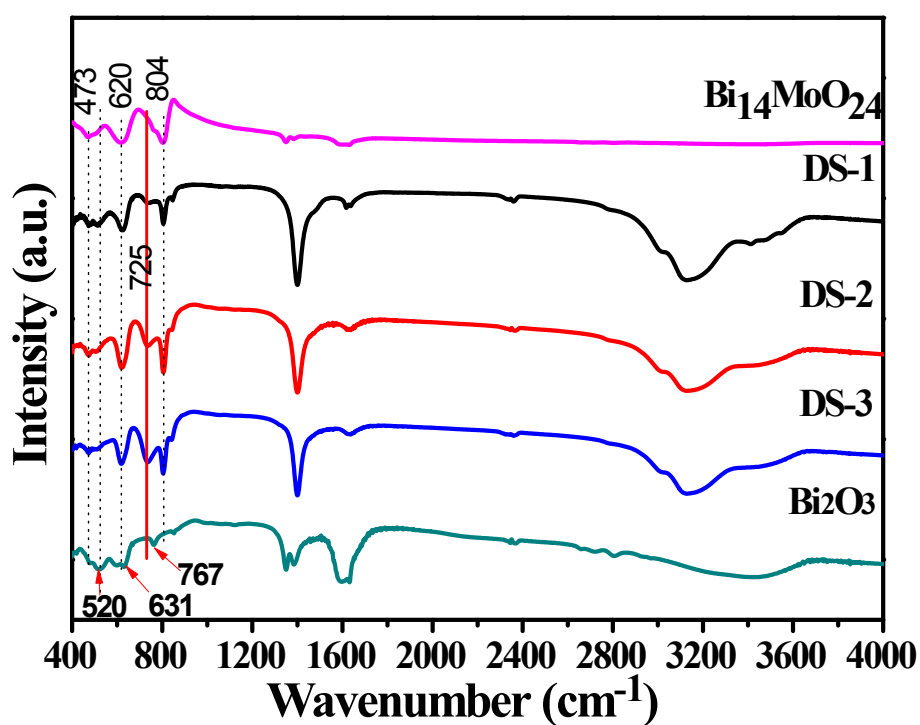

**Figure S2** IR spectra of pure  $\text{Bi}_2\text{O}_3$ ,  $\text{Bi}_{14}\text{MoO}_{24}$  and  $\text{Bi}_2\text{O}_3$ - $\text{Bi}_{14}\text{MoO}_{24}$  heterostructures.

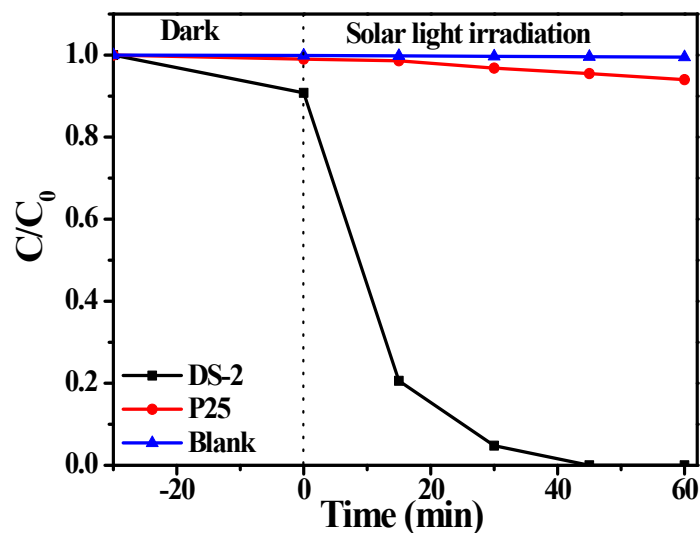

Figure S3 Photocatalytic degradation curves of MO using DS-2 and P25 as photocatalysts.

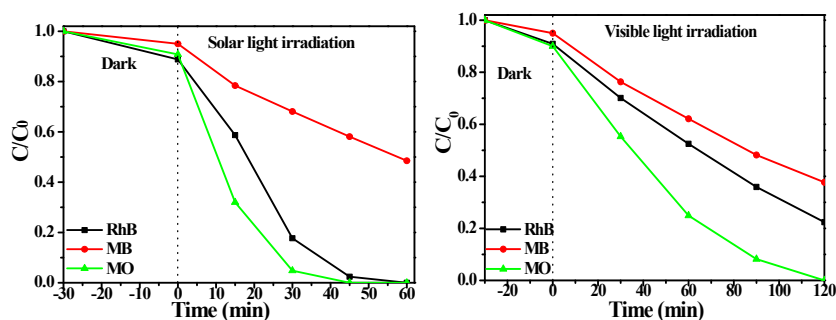

Figure S4 Photocatalytic degradation curves of different dyes (10 mg/L) using DS-2 as photocatalyst.

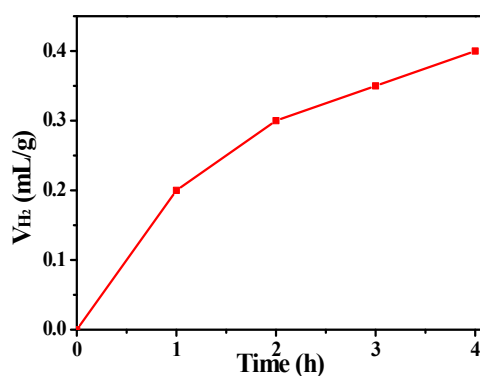

Figure S5 Volume of hydrogen generated ( $V_{H_2}$ ) under solar light irradiation from a 300 W Xe light using DS-2 sample.

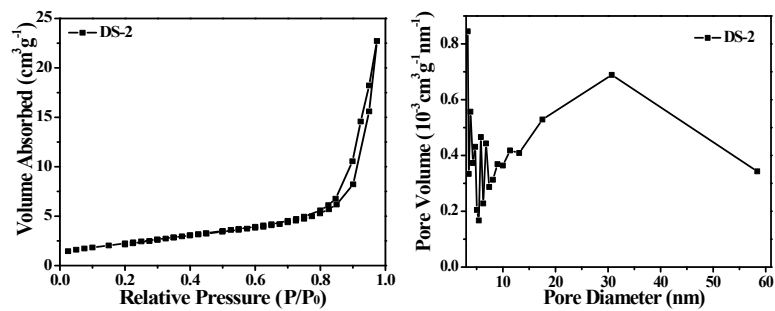

**Figure S6** (a) Nitrogen adsorption–desorption isotherm and (b) the corresponding pore-size distribution of the DS-2 sample.
